# Supplementary material for: The COVID-19 Outbreak and Psychological Distress in Healthcare Workers: The Role of Personality Traits, Attachment Styles, and Sociodemographic Factors
Source: MDPI journal article supplement (doi:10.3390/su13094992), 2021-04-29
Supplement: s1 [file s1]

**Table S1.** Mean and Standard Deviation of DASS-21, ASQ, and PID-5-BF scores.

| <b>DASS-21</b>                   | <b><i>M (SD)</i></b> |
|----------------------------------|----------------------|
| DASS-21 Stress                   | 6.21 (4.4)           |
| DASS-21 Depression               | 4.22 (4.1)           |
| DASS-21 Anxiety                  | 2.49 (3.5)           |
| DASS-21 Total Score              | 13.99 (11.4)         |
| <b>ASQ</b>                       | <b><i>M (SD)</i></b> |
| Discomfort with Closeness        | 31.22 (6.85)         |
| Need for Approval                | 18.04 (6.59)         |
| Preoccupation with Relationships | 26.69 (7.63)         |
| Relationships as Secondary       | 13.95 (5.3)          |
| <b>PID-5-BF</b>                  | <b><i>M (SD)</i></b> |
| Negative Affect                  | 4.34 (2.98)          |
| Detachment                       | 2.26 (2.58)          |
| Antagonism                       | 2.51 (2.38)          |
| Disinhibition                    | 2.57 (2.59)          |
| Psychoticism                     | 2.79 (2.57)          |

**Table S2.** DASS-21 Classification Levels.

|                            | <b><i>M(SD)</i></b><br><b>(Bottesi et al., 2015)</b> | <b>Normal</b> | <b>High</b> |
|----------------------------|------------------------------------------------------|---------------|-------------|
| <b>DASS-21 Stress</b>      | 6.4 (3.8)                                            | ≤ 10.2        | > 10.2      |
| <b>DASS-21 Depression</b>  | 3.5 (3.2)                                            | ≤ 6.7         | > 6.7       |
| <b>DASS-21 Anxiety</b>     | 2.4 (2.6)                                            | ≤ 5           | > 5         |
| <b>DASS-21 Total Score</b> | 12.3 (8.3)                                           | ≤ 20.6        | > 20.6      |
